# Supplementary material for: PABPN1 prevents the nuclear export of an unspliced RNA with a constitutive transport element and controls human gene expression via intron retention
Source: PubMed Central journal article supplement — RNA. 2023 May;29(5):644–62. doi: 10.1261/rna.079294.122 (PMC10158996; doi:10.1261/rna.079294.122), 2023-05
Supplement: supp_079294.122_Supplemental_Fig_S1.pdf [file supp_079294.122_Supplemental_Fig_S1.pdf]

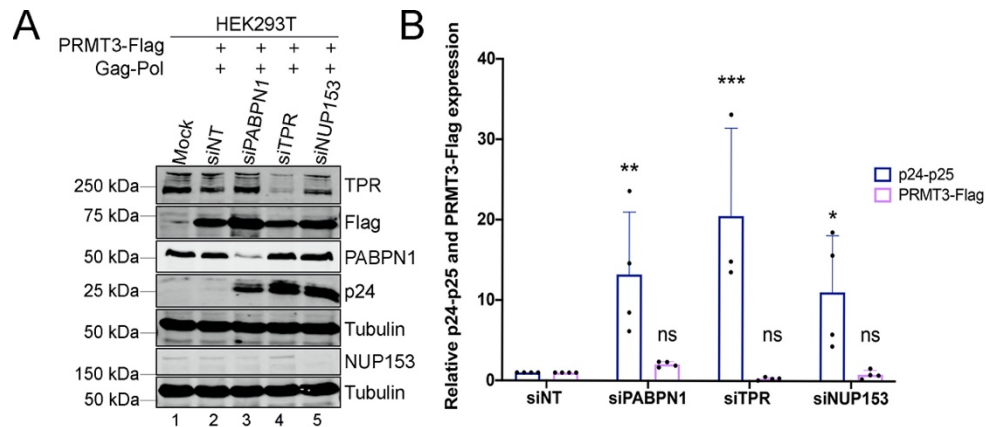

**Supplemental Figure 1.** Depletion of PABPN1, TPR, and NUP153 specifically affects the expression of the unspliced CTE-containing *gag-pol* transcript. (A) Western blot analysis of the indicated proteins using total extracts prepared from HEK293T cells that were previously co-transfected with the indicated siRNAs, the Gag-Pol-CTE construct (lanes 2-5) and a construct that contains the *PRMT3-flag* cDNA (lanes 2-5). (B) Levels of p24/p25<sup>gag</sup> and PRMT3-Flag were normalized to Tubulin levels and were expressed relative to values for cells treated with nontarget (siNT) siRNAs. Data and error bars represent the means and standard deviations, respectively, from independent experiments. ns, *P*-value > 0.05; \**P* value >0.05; \*\**P* value <0.01; \*\*\**P* value <0.001.
