# Supplementary material for: PABPN1 prevents the nuclear export of an unspliced RNA with a constitutive transport element and controls human gene expression via intron retention
Source: PubMed Central journal article supplement — RNA. 2023 May;29(5):644–62. doi: 10.1261/rna.079294.122 (PMC10158996; doi:10.1261/rna.079294.122), 2023-05
Supplement: supp_079294.122_Supplemental_Fig_S2.pdf [file supp_079294.122_Supplemental_Fig_S2.pdf]

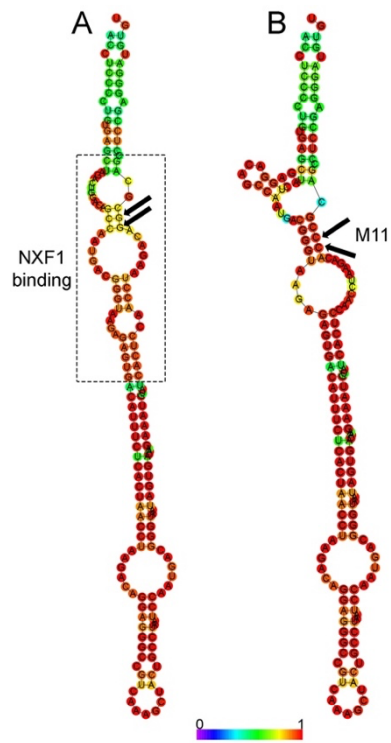

**Supplemental Figure 2.** Predicted structure of wild-type and M11 versions of the MPMV constitutive transport element (CTE). Secondary structures were predicted by RNAfold, where two guanosine bases in the wild-type CTE (A, see arrows) were mutated to cytosines in the M11 mutant (B, arrows) to perturb the structure of the NXF1-binding region. The heat color gradation indicates the base-pairing probability from 0 to 1.
