# Supplementary material for: PABPN1 prevents the nuclear export of an unspliced RNA with a constitutive transport element and controls human gene expression via intron retention
Source: PubMed Central journal article supplement — RNA. 2023 May;29(5):644–62. doi: 10.1261/rna.079294.122 (PMC10158996; doi:10.1261/rna.079294.122), 2023-05
Supplement: supp_079294.122_Supplemental_Fig_S3.pdf [file supp_079294.122_Supplemental_Fig_S3.pdf]

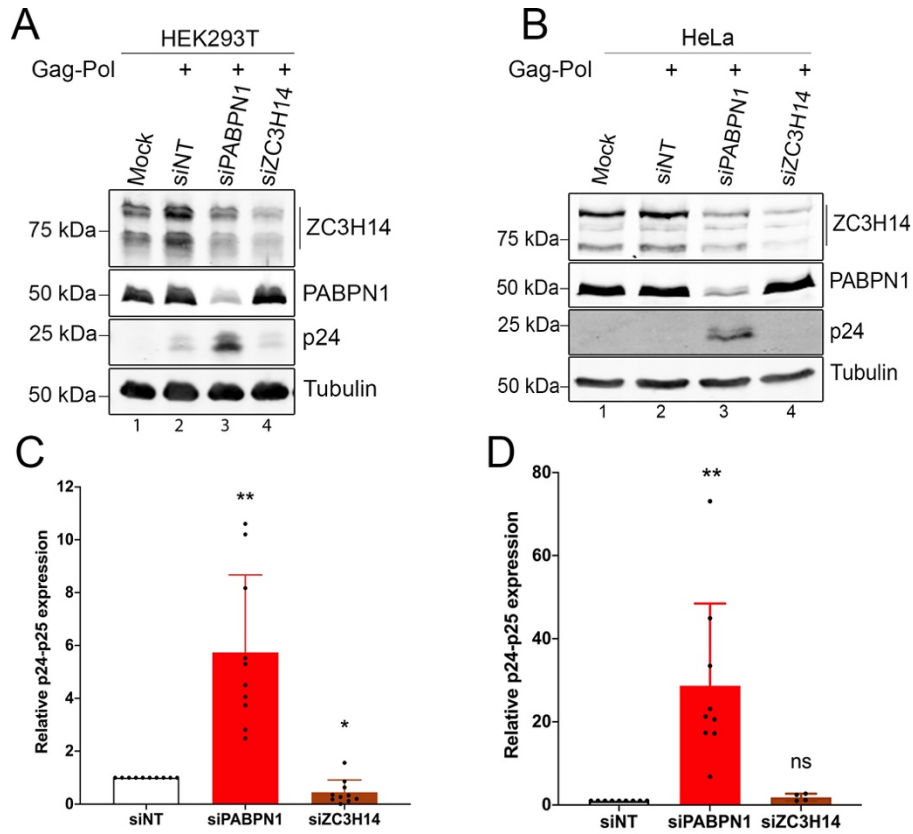

**Supplemental Figure 3. Depletion of ZC3H14 does not enhance expression of CTE-containing unspliced transcripts** (A-B) Western blot analysis of the indicated proteins using total extracts prepared from HEK293T (A) and HeLa (B) cells that were previously co-transfected with the Gag-Pol-CTE construct and the indicated siRNAs (lanes 2-4) or mock transfected (lane 1). (C-D) Levels of p24/p25<sup>Gag</sup> in HEK293T (C) and HeLa (D) cells were normalized to Tubulin levels and were expressed relative to values for cells treated with nontarget (siNT) siRNAs. Data and error bars represent the means and standard deviations, respectively, from independent experiments. ns, *P*-value > 0.05; \**P*-value < 0.05; \*\**P*-value < 0.01.
