# Supplementary material for: PABPN1 prevents the nuclear export of an unspliced RNA with a constitutive transport element and controls human gene expression via intron retention
Source: PubMed Central journal article supplement — RNA. 2023 May;29(5):644–62. doi: 10.1261/rna.079294.122 (PMC10158996; doi:10.1261/rna.079294.122), 2023-05
Supplement: supp_079294.122_Supplemental_Fig_S4.pdf [file supp_079294.122_Supplemental_Fig_S4.pdf]

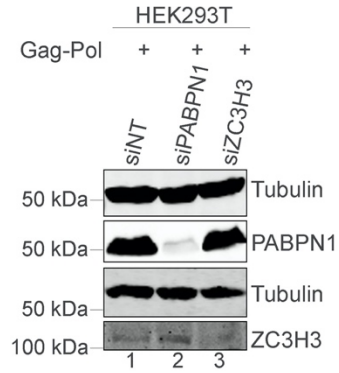

**Supplemental Figure 4.** siRNA-mediated depletion of ZC3H3. Western blot analysis of the indicated proteins using total extracts prepared from HEK293T cells that were previously co-transfected with the Gag-Pol-CTE construct and the indicated siRNAs, confirming efficient depletion of PABPN1 (lane 2) and ZC3H3 (lane 3).
