# Supplementary material for: PABPN1 prevents the nuclear export of an unspliced RNA with a constitutive transport element and controls human gene expression via intron retention
Source: PubMed Central journal article supplement — RNA. 2023 May;29(5):644–62. doi: 10.1261/rna.079294.122 (PMC10158996; doi:10.1261/rna.079294.122), 2023-05
Supplement: supp_079294.122_Supplemental_Fig_S5.pdf [file supp_079294.122_Supplemental_Fig_S5.pdf]

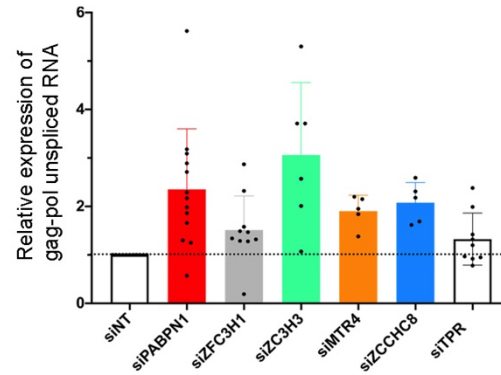

**Supplemental Figure 5.** Analysis of unspliced *gag-pol* RNA in cells depleted for PAXT, NEXT, and TPR. RT-qPCR analysis of unspliced *gag-pol* transcripts using total RNA harvested from HEK293T cells transfected with the indicated siRNAs. Data and error bars represent the means and standard deviations, respectively, from independent experiments.
