# Supplementary material for: PABPN1 prevents the nuclear export of an unspliced RNA with a constitutive transport element and controls human gene expression via intron retention
Source: PubMed Central journal article supplement — RNA. 2023 May;29(5):644–62. doi: 10.1261/rna.079294.122 (PMC10158996; doi:10.1261/rna.079294.122), 2023-05
Supplement: supp_079294.122_Supplemental_Fig_S7.pdf [file supp_079294.122_Supplemental_Fig_S7.pdf]

5' ACCTCCCCTGTGAGCTAGACTGGACAGCCAATGACGGGTAAGAGAGTGACATTTCTCA  
 CTAACCTAAGACAGGAGGGCCGTCAAAGCTACTGCCTAATCCAATGACGGGTAATAGTGA  
 CAAGAAATGTATCACTCCAACCTAAGACAGGCGCAGCCTCCGAGGGATGTGTCTTTTGT  
 TTTTATAATTAAAAAGGGTGACATGTCCGGAGCCGTGCTGCCCGGATGATGTCTTGGCCT  
 ← RNAse H cleavage primer  
 CTGTTTGCTCTAGCTCCATGTTATGAATTTAAGATGGCGTATTTCTGGTTCTTCTCCGT  
 CTTACTTTCCCGCCGGCGGAATGTTTCCCGCTCTTGGGCTTACGTGGCTTTCCTTGCTC  
 TGCTACTGAGCATGCGCCAGTATCTTTCCCTCCCACTTGCTGCCTGTGTATATAAGGC  
 AACACATTGCCACCATTAAATGAGACTTGATCAGAACAACACTGTCTTGTCTCCATTTCTTGT  
 ↑ p(A)<sub>PROXIMAL</sub>  
 GTCTCTTGTTCCTTCAATTCCCCTCCCTCCAGGTTCCCTACTGTTGATCCCGATCT  
 TTTTCCCTCTGCCAAAATTATGGGGACATCATGAAGCCCTTGAGCATCTGACTTCTGG  
 CTAAATAAGGAAATTTATTTTCATTGCAATAGTGTGTTGGAATTTTTTGTGTCTCTCA 3'

↑ p(A)<sub>DISTAL</sub>

**Supplemental Figure 7.** Poly(A) sites of the Gag-Pol-MPMV construct. 3'-RACE was used to amplify cDNAs corresponding to the 3' UTR of the MPMV RNA. The position of the two major polyadenylation sites is indicated by blue arrowheads. Putative poly(A) signals are shown in orange lettering. The position of the DNA oligonucleotide used for the RNase H cleavage assays is shown by the purple arrow. Nucleotides in red correspond to the MPMV CTE element.
