# Supplementary material for: PABPN1 prevents the nuclear export of an unspliced RNA with a constitutive transport element and controls human gene expression via intron retention
Source: PubMed Central journal article supplement — RNA. 2023 May;29(5):644–62. doi: 10.1261/rna.079294.122 (PMC10158996; doi:10.1261/rna.079294.122), 2023-05
Supplement: supp_079294.122_Supplemental_Fig_S8.pdf [file supp_079294.122_Supplemental_Fig_S8.pdf]

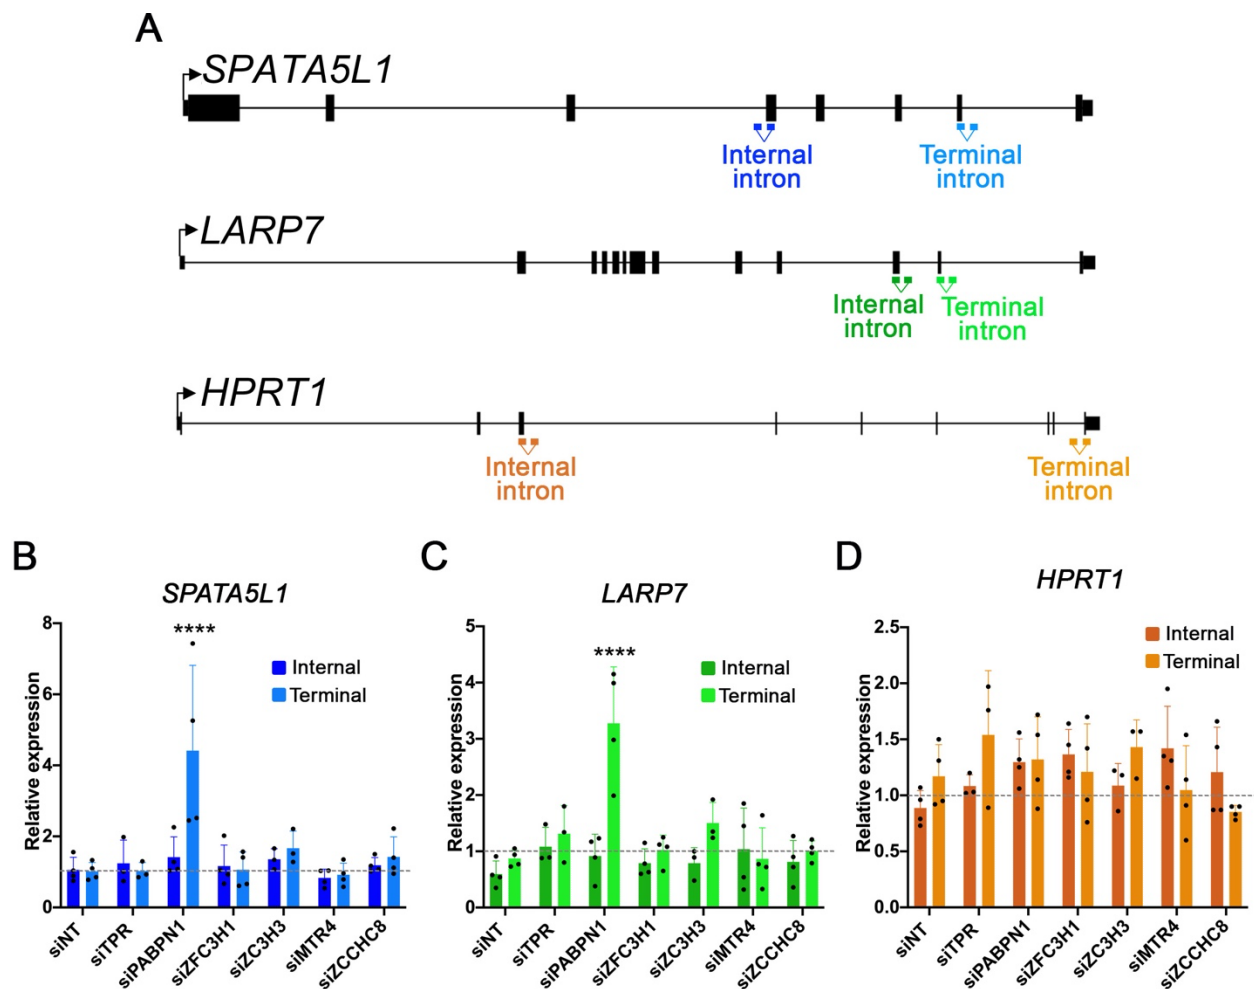

**Supplemental Figure 8.** Increased intron retention in PABPN1-deficient cells by RT-qPCR. (A) Schematic of the *SPATA5L1*, *LARP7*, *HPRT1* genes with exons (black boxes) and introns (lines). Boxes under the genes show the position of the primer pairs used to analyze levels of internal and terminal introns by RT-qPCR assays. (B-D) RT-qPCR data to quantify the expression levels of *SPATA5L1* (B), *LARP7* (C), and *HPRT1* (D) internal and terminal introns in cells treated with the indicated siRNAs using primers across exon-intron junctions (see panel A). The data and error bars represent the average and standard deviation from independent experiments. \*\*\*\**P* value <0.0001, from student's T-test.
