# Supplementary material for: PABPN1 prevents the nuclear export of an unspliced RNA with a constitutive transport element and controls human gene expression via intron retention
Source: PubMed Central journal article supplement — RNA. 2023 May;29(5):644–62. doi: 10.1261/rna.079294.122 (PMC10158996; doi:10.1261/rna.079294.122), 2023-05
Supplement: supp_079294.122_Supplemental_Table_S1.pdf [file supp_079294.122_Supplemental_Table_S1.pdf]

**Supplemental Table 1. siRNAs sequences used in this study.**

| <i>siRNAs</i>                                               | <i>Sequences (5'-3')</i>      |
|-------------------------------------------------------------|-------------------------------|
| <i>siGENOME Non-Targeting siRNA#4 (siControl) Dharmacon</i> | D-001210-04-05                |
| <i>PABPN1#5</i>                                             | GGAACGGCCUGGAGUCUGAUU         |
| <i>PABPN1#6</i>                                             | AGUCAACCGUGUUACCAUAUU         |
| <i>ZFC3H1</i>                                               | GAUUAGAGUCCAUGAUUAAdTdT       |
| <i>ZC3H3</i>                                                | GCACAAGCCUCCUGGAGAdTdT        |
| <i>MTR4</i>                                                 | CAAUUAAGGCUCUGAGUAAUU         |
| <i>ZCCHC8</i>                                               | GGAAUGUACCUCAGGAUAAdTdT       |
| <i>TPR</i>                                                  | GCACAACAGGAUAAGGUUAdTdT       |
| <i>NUP153</i>                                               | GGACUUGUUAGAUCUAGUUdTdT       |
| <i>ZC3H14</i>                                               | UGUUUGUUUGUUCACCCAAAUUGUAdTdT |
| <i>PABPN1 3'UTR V1</i>                                      | ACAGAAGATGACCTTGATGUU         |
| <i>PABPN1 3'UTR V2</i>                                      | AACTGTTCTGCTTGTACCUU          |
