# Supplementary material for: PABPN1 prevents the nuclear export of an unspliced RNA with a constitutive transport element and controls human gene expression via intron retention
Source: PubMed Central journal article supplement — RNA. 2023 May;29(5):644–62. doi: 10.1261/rna.079294.122 (PMC10158996; doi:10.1261/rna.079294.122), 2023-05
Supplement: supp_079294.122_Supplemental_Table_S2.pdf [file supp_079294.122_Supplemental_Table_S2.pdf]

**Supplemental Table 2. Primary antibodies and their dilution used in this study.**

| <i>Antibodies</i>                                        | <i>Dilutions</i> |
|----------------------------------------------------------|------------------|
| <i>Anti-Tubulin (T5168; Sigma-Aldrich)</i>               | 1:4000           |
| <i>Anti-Flag (F1804; Sigma-Aldrich)</i>                  | 1:1000           |
| <i>Anti-PABPN1 (ab75855; Abcam)</i>                      | 1:1000           |
| <i>Anti-ZFC3H1 (NB100-68267; Novus Biologicals)</i>      | 1:1000           |
| <i>Anti-ZC3H3 (A301-878A; Bethyl Laboratories)</i>       | 1:1000           |
| <i>Anti-MTR4 (ab70551; Abcam)</i>                        | 1:1000           |
| <i>Anti-ZCCHC8 (NB100-94995; Novus Biologicals)</i>      | 1:1000           |
| <i>Anti-TPR (sc-271565; Santa Cruz Biotechnology)</i>    | 1:500            |
| <i>Anti-NUP153 (sc-101544; Santa Cruz Biotechnology)</i> | 1:1000           |
| <i>Anti-ZC3H14 (A303-993A; Bethyl Laboratories)</i>      | 1:1000           |
| <i>Anti-p24 (ab9071 and ab63917; Abcam)</i>              | 1:1000           |
