# Supplementary material for: PABPN1 prevents the nuclear export of an unspliced RNA with a constitutive transport element and controls human gene expression via intron retention
Source: PubMed Central journal article supplement — RNA. 2023 May;29(5):644–62. doi: 10.1261/rna.079294.122 (PMC10158996; doi:10.1261/rna.079294.122), 2023-05
Supplement: supp_079294.122_Supplemental_Table_S3.pdf [file supp_079294.122_Supplemental_Table_S3.pdf]

**Supplemental Table 3. List of DNA probes used for Northern blot.**

| <i>Names</i> | <i>Targets</i> | <i>Reverse (5'-3')</i>                                     |
|--------------|----------------|------------------------------------------------------------|
| FB6185       | HIV-gag#1      | GCCAGGATTAAGTGCGAATCG                                      |
| FB6187       | HIV-gag#2      | GCCCTTCTTTGCCACAATTG                                       |
| FB6641       | MPMV           | ATTTAGGTGACACTATAGGATCGGGATCAACAGTAGGAAC                   |
| FB6243       | CTE            | CCGTCATTGGATTAGGCAGTAGCTTTGACGGCCCTGGTGTCTTAG<br>GTTAGTGAG |
| FB3736       | RPS2#1         | TCTTCATGTCCTTGACCAAGC                                      |
| FB3329       | RPS2#2         | GGCACGGGTCTGCTTCTG                                         |
| FB6856       | MPMV#1         | CAAGGAAAGCCACGTAAGCCC (for RNase H)                        |
| FB6857       | MPMV#2         | GGAGCTAGAGCAAACAGAGGC (for RNase H)                        |
| FB6858       | MPVM#3         | AAGACGGAGAAGAACCAGGAA (for RNase H)                        |
