# Supplementary material for: PABPN1 prevents the nuclear export of an unspliced RNA with a constitutive transport element and controls human gene expression via intron retention
Source: PubMed Central journal article supplement — RNA. 2023 May;29(5):644–62. doi: 10.1261/rna.079294.122 (PMC10158996; doi:10.1261/rna.079294.122), 2023-05
Supplement: supp_079294.122_Supplemental_Table_S4.pdf [file supp_079294.122_Supplemental_Table_S4.pdf]

**Supplemental Table 4. List of oligonucleotides used for qRT-PCR analysis.**

| <i>Targets</i>               | <i>Forward (5'-3')</i>  | <i>Reverse (5'-3')</i>    |
|------------------------------|-------------------------|---------------------------|
| <i>GAPDH</i>                 | GTCAGCCGCATCTTCTTTTG    | GCGCCCAATACGACCAAATC      |
| <i>SNHG19</i>                | ACGATCTTGGGACGAACTGA    | AGGGACAAAGTGGTGCGTAG      |
| <i>p24 gag</i>               | TTCAGCCCAGAAGTGATACC    | CAGCTTCCTCATTGATGGTC      |
| <i>SPATA5L1</i>              | GGAGAATGGACTGTTTCCAG    | TGTGTCAGGCCCATTTCTAAC     |
| <i>internal intron</i>       |                         |                           |
| <i>SPATA5L1</i>              | GCTGATCTTAGAAACCTCTGC   | CACCCACACTTACAATAAGC      |
| <i>terminal intron</i>       |                         |                           |
| <i>LARP7 internal intron</i> | GGAAACTCGAGATCCTTTCTGG  | GTACTCCAGCCTGAGCGAC       |
| <i>LARP7 terminal intron</i> | CAGCCTCGGGAAAAGAAAAGAG  | GAAATGACTTTTCCCTCCCAACC   |
| <i>HPRT1 internal intron</i> | GACCTGCTGGATTACATCAAAG  | AGAAAACCTACTGTTGCCACT     |
| <i>HPRT1 terminal intron</i> | GAACCCTGACAATAATAGTGTTT | GCTTTTCCAGTTTCACTAATGACAC |
