# Supplementary material for: PABPN1 prevents the nuclear export of an unspliced RNA with a constitutive transport element and controls human gene expression via intron retention
Source: PubMed Central journal article supplement — RNA. 2023 May;29(5):644–62. doi: 10.1261/rna.079294.122 (PMC10158996; doi:10.1261/rna.079294.122), 2023-05
Supplement: supp_079294.122_Supplemental_Table_S5.pdf [file supp_079294.122_Supplemental_Table_S5.pdf]

**Supplemental Table 5. List of probes used for smFISH.**

| Probes # | Sequences 5'-3' with FLAP complementary sequence in bold              |
|----------|-----------------------------------------------------------------------|
| 1        | AGTTAAAGGATACAGTTCCTTGTCTATCGGCT <b>CCTCCTAAGTTTCGAGCTGGACTCAGTG</b>  |
| 2        | CATGCACTGGATGCACTCTATCCCAT <b>CCTCCTAAGTTTCGAGCTGGACTCAGTG</b>        |
| 3        | TTATTGTGACGAGGGGTCGTTGCCAAAGAGTG <b>CCTCCTAAGTTTCGAGCTGGACTCAGTG</b>  |
| 4        | TGCTTCTGAGGGGGAGTTGTTGTCTCTAC <b>CCTCCTAAGTTTCGAGCTGGACTCAGTG</b>     |
| 5        | CAGACCTGAAGCTCTCTTCTGGTGGGG <b>CCTCCTAAGTTTCGAGCTGGACTCAGTG</b>       |
| 6        | CCCTTTTCTAGGGGCCCTGCAATT <b>CCTCCTAAGTTTCGAGCTGGACTCAGTG</b>          |
| 7        | TGGCTGTGTGCCCTTCTTGGCACA <b>CCTCCTAAGTTTCGAGCTGGACTCAGTG</b>          |
| 8        | TCTAGTGTAGCCGCTGGTCCCAATGCC <b>CCTCCTAAGTTTCGAGCTGGACTCAGTG</b>       |
| 9        | ATAGTCTTACAATCTGGGTTGCATTTTGGAC <b>CCTCCTAAGTTTCGAGCTGGACTCAGTG</b>   |
| 10       | TGAAGCTTGCTCGGCTCTTAGAGTTTTATAGAC <b>CCTCCTAAGTTTCGAGCTGGACTCAGTG</b> |
| 11       | CGGTCTACATAGTCTCTAAAGGGTTCCTTGG <b>CCTCCTAAGTTTCGAGCTGGACTCAGTG</b>   |
| 12       | CTTGTCTTATGTCCAGAATGCTGGTAGGG <b>CCTCCTAAGTTTCGAGCTGGACTCAGTG</b>     |
| 13       | CTGGGATAGGTGGATTATTTGTCATCCATCC <b>CCTCCTAAGTTTCGAGCTGGACTCAGTG</b>   |
| 14       | TTTGTTCTGAAGGGTACTAGTAGTTTCTG <b>CCTCCTAAGTTTCGAGCTGGACTCAGTG</b>     |
| 15       | TGCAGCTTCCTCATTGATGGTCTCTTTAA <b>CCTCCTAAGTTTCGAGCTGGACTCAGTG</b>     |
| 16       | CATGGTGTAAATCTTGTGGGGTGGCTCC <b>CCTCCTAAGTTTCGAGCTGGACTCAGTG</b>      |
| 17       | GCTGAAAGCCTTCTCTTACTACTTTTAC <b>CCTCCTAAGTTTCGAGCTGGACTCAGTG</b>      |
| 18       | ATAGGGTAATTTGGCTGACCTGATTGCTGT <b>CCTCCTAAGTTTCGAGCTGGACTCAGTG</b>    |
| 19       | GTGTCAGCTGCTGCTTGTGTGCTTT <b>CCTCCTAAGTTTCGAGCTGGACTCAGTG</b>         |
| 20       | GGATGGTTGTAGCTGTCCAGTATTTGTCT <b>CCTCCTAAGTTTCGAGCTGGACTCAGTG</b>     |
| 21       | AGCCTTCTGATGTTTCTAACAGGCCAGG <b>CCTCCTAAGTTTCGAGCTGGACTCAGTG</b>      |
| 22       | TAACTGCGAATCGTTCTAGCTCCCTGCC <b>CCTCCTAAGTTTCGAGCTGGACTCAGTG</b>      |
| 23       | TGGCCTTCCCTTGTAGGAAGGCCAGAC <b>CCTCCTAAGTTTCGAGCTGGACTCAGTG</b>       |
| 24       | CTACTCCCTGACATGCTGTCATCATTT <b>CCTCCTAAGTTTCGAGCTGGACTCAGTG</b>       |
| FLAP     | CACTGAGTCCAGCTCGAACTTAGGAGG                                           |
